# Supplementary material for: The BRCA2 mutation status shapes the immune phenotype of prostate cancer
Source: Springer Nature journal article supplement (doi:10.1007/s00262-019-02393-x), 2019-09-23
Supplement: MOESM1 [file 17199386]

**Supplementary Table 1. Overview of *BRCA2* mutations.**

| Patient | <i>BRCA2</i> Mutation | dbSNP       | Deleterious Mutation | Germline Mutation |
|---------|-----------------------|-------------|----------------------|-------------------|
| 1       | p.Gln2960*            | rs80359140  | +                    | n.t.              |
| 2       | p.His2093fs*7         | n/a         | +                    | n.t.              |
| 3       | p.Val1283fs*2         | rs80359405  | +                    | n.t.              |
| 4       | p.Ser1951fs*11        | n/a         | +                    | n.t.              |
| 5       | p.Ser1722fs*4         | rs80359490  | +                    | n.t.              |
| 6       | p.Ile1247fs*12        | rs886040494 | +                    | +                 |
| 7       | p.Phe1182fs*1         | rs80359388  | +                    | n.t.              |
| 8       | p.Pro2991_Thr3033del  | n/a         | +                    | n.t.              |

n.t., not tested

**Supplementary Table 2. Patient characteristics.**

| Group                                                           | <i>BRCA1/2</i> wildtype<br>(n=8) | <i>BRCA2</i> mutated<br>(n=8) | p-value           |
|-----------------------------------------------------------------|----------------------------------|-------------------------------|-------------------|
| BRCA1 mutations                                                 | 0 (0.0%)                         | 0 (0.0%)                      |                   |
| BRCA2 mutations                                                 |                                  |                               |                   |
| Hereditary                                                      | 0 (0.0%)                         | 1 (12.5%)                     |                   |
| Somatic                                                         | 0 (0.0%)                         | 7 (87.5%)                     |                   |
| Age at Diagnosis,<br>years, mean (SD)                           | 62.05 (7.83)                     | 66.59 (7.07)                  | 0.24 <sup>a</sup> |
| Initial PSA (µg/l),<br>median (range)                           | 23.35 (11.6-131.0)               | 21.00 (5.6-362.0)             | 0.60 <sup>a</sup> |
| Initial pT stage                                                |                                  |                               |                   |
| pT3                                                             | 8 (100.0%)                       | 7 (87.5%)                     | 1.00 <sup>b</sup> |
| pT4                                                             | 0 (0.0%)                         | 1 (12.5%)                     |                   |
| Initial pN stage                                                |                                  |                               |                   |
| pN0                                                             | 1 (12.5%)                        | 2 (25.0%)                     | 1.00 <sup>b</sup> |
| pN1                                                             | 7 (87.5%)                        | 6 (75.0%)                     |                   |
| Initial c/pM stage                                              |                                  |                               |                   |
| c/pM0                                                           | 4 (50.0%)                        | 4 (50.0%)                     | 1.00 <sup>b</sup> |
| c/pM1                                                           | 4 (50.0%)                        | 4 (50.0%)                     |                   |
| Gleason-Score                                                   |                                  |                               |                   |
| 7-8                                                             | 2 (25.0%)                        | 3 (37.5%)                     | 1.00 <sup>b</sup> |
| 9-10                                                            | 6 (75.0%)                        | 5 (62.5%)                     |                   |
| Progression free<br>survival under<br>ADT, months,<br>mean (SD) | 34.91 (27.11)                    | 21.96 (22.61)                 | 0.32 <sup>a</sup> |
| Overall survival,<br>months, mean<br>(SD)                       | 58.48 (30.58)                    | 43.33 (23.35)                 | 0.28 <sup>a</sup> |
| Cancer spec.<br>death                                           |                                  |                               |                   |
| Yes                                                             | 7 (87.5%)                        | 6 (75.0%)                     | 1.00 <sup>b</sup> |

<sup>a</sup>Student's t-test (independent, two-sided)<sup>b</sup>Fisher's exact test

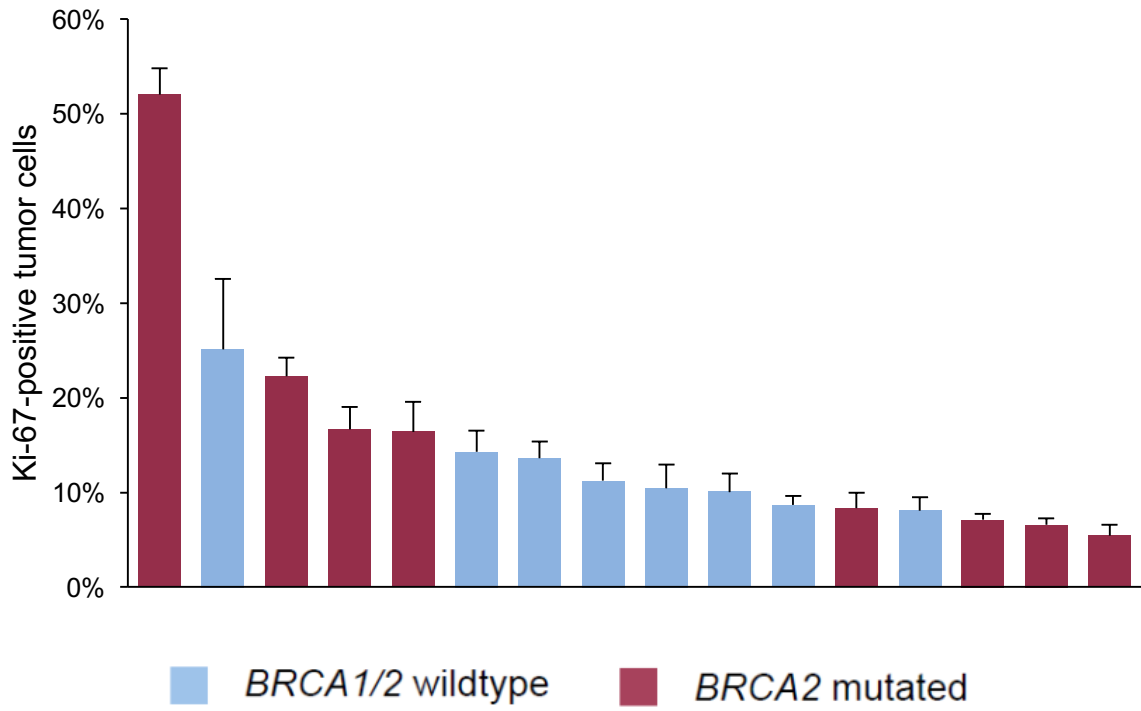

**Supplementary Figure 1.** Waterfall plot of the percentage of Ki-67-positive tumor cells in *BRCA1/2* wildtype (blue) and *BRCA2* mutated (red) prostate cancers.
